# Supplementary material for: Evaluating Behavioural Interventions for Oropharyngeal Dysphagia in Adults: A Systematic Review and Meta-Analysis of Swallowing Manoeuvres, Exercises, and Postural Techniques
Source: MDPI journal article supplement (doi:10.3390/jcm14207180), 2025-10-11
Supplement: s1 [file Supplementary Table S1 Common swallowing manoeuvres, exercises and postural strategies.pdf › Supplementary Table S1 Common swallowing manoeuvres, exercises and postural strategies.pdf]

**Supplementary Table S1. Common swallow manoeuvres, exercises and postural strategies.**

| Treatment approach                                                        | Synonyms<br>(Similar terms)                                                    | Deficits                                                                                                                                         | Purpose                                                                                                                                                                                                                                                                                                                                                                                                                                                                     | Description                                                                                                                                                                                                                                                                                                                                          |
|---------------------------------------------------------------------------|--------------------------------------------------------------------------------|--------------------------------------------------------------------------------------------------------------------------------------------------|-----------------------------------------------------------------------------------------------------------------------------------------------------------------------------------------------------------------------------------------------------------------------------------------------------------------------------------------------------------------------------------------------------------------------------------------------------------------------------|------------------------------------------------------------------------------------------------------------------------------------------------------------------------------------------------------------------------------------------------------------------------------------------------------------------------------------------------------|
| <b>Swallow manoeuvre</b>                                                  |                                                                                |                                                                                                                                                  |                                                                                                                                                                                                                                                                                                                                                                                                                                                                             |                                                                                                                                                                                                                                                                                                                                                      |
| <b>Effortful swallow</b><br>(compensatory and rehabilitative)             | Effortful swallow<br>Hard swallow<br>(manoeuvre / technique)                   | <ul style="list-style-type: none"> <li>- decreased tongue base retraction</li> <li>- decreased oropharyngeal pressure</li> </ul>                 | <p>To improve pharyngeal bolus propulsion, reducing residue in the valleculae and/or pyriform sinuses and aspiration [1-3]:</p> <ul style="list-style-type: none"> <li>- by strengthening the muscles involved in swallowing (tongue, infrahyoid, suprahyoid),</li> <li>- by increasing tongue base retraction and posterior pharyngeal wall movement during the swallowing,</li> <li>- by increasing orolingual and pharyngeal bolus pressure generation [1,4].</li> </ul> | <p>Voluntary swallow with maximal effort (with or without bolus):</p> <ul style="list-style-type: none"> <li>- achieved by forcefully squeezing the tongue and throat muscles [4] or by pushing the tongue hard against the hard palate [1]</li> </ul>                                                                                               |
| <b>Mendelsohn manoeuvre</b><br>(compensatory and rehabilitative)          | Mendelsohn                                                                     | <ul style="list-style-type: none"> <li>- decreased movement of the hyolaryngeal complex</li> <li>- discoordination of swallowing[5,6]</li> </ul> | <p>To enhance bolus propulsion through the pharynx, reducing pharyngeal residue and aspiration [7-9]:</p> <ul style="list-style-type: none"> <li>- by volitional increase in the duration of submental muscle contraction,</li> <li>- by improving the coordination of the swallowing muscles [10,11].</li> </ul>                                                                                                                                                           | <p>Squeezing the swallow at the apex [7,8]. Begin swallowing normally. When the larynx reaches its highest point, voluntarily hold that position for a few seconds before relaxing and completing the swallow [12]</p>                                                                                                                               |
| <b>Supraglottic swallow</b><br>(compensatory and/or rehabilitative)       | Voluntary airway closure<br>Breath-holding<br>manoeuvre / technique / strategy | Decreased airway protection at the level of glottis [13,14]                                                                                      | <p>To increase airway protection and reduce the risk of aspiration during the swallow [15]:</p> <ul style="list-style-type: none"> <li>- by closing the airway at the level of the vocal folds before swallowing [5,8,13,16,17].</li> </ul>                                                                                                                                                                                                                                 | <p>A voluntary breath-hold technique performed without extra effort:<br/>Inhale and hold the breath before and during the swallow. Cough at the end of the swallow (before inhaling) [12,18].</p>                                                                                                                                                    |
| <b>Super supraglottic swallow</b><br>(compensatory and/or rehabilitative) | As per<br>Supraglottic swallow                                                 | Decreased airway protection before and during swallowing at the level of supraglottis [6]                                                        | <p>To increase airway protection and reduce the risk of aspiration before and during the swallow [19]:</p> <ul style="list-style-type: none"> <li>- by closing the airway at the level of the supraglottis (laryngeal vestibulum and vestibular folds) before and during swallowing [6,20,21].</li> </ul>                                                                                                                                                                   | <p>A voluntary breath-hold technique performed with the forceful effort.<br/>Inhale, bear down and hold the breath before and during the swallow. Cough at the end of the swallow (before inhaling) [19,22].</p>                                                                                                                                     |
| <b>Swallow exercise</b>                                                   |                                                                                |                                                                                                                                                  |                                                                                                                                                                                                                                                                                                                                                                                                                                                                             |                                                                                                                                                                                                                                                                                                                                                      |
| <b>Chin tuck against resistance (CTAR)</b><br>(rehabilitative)            | Modified<br>Shaker exercise                                                    | <ul style="list-style-type: none"> <li>- reduced movement of the hyolaryngeal complex</li> <li>- abnormal UES opening [23]</li> </ul>            | <p>To improve swallowing ability, bilateral vallecular and pyriform sinus residue clearance and reduce post-swallow aspiration:</p> <ul style="list-style-type: none"> <li>- by strengthening the suprahyoid muscles using resistance,</li> <li>- by promoting hyo-laryngeal complex elevation,</li> <li>- by reducing strain on the neck muscles [23-25].</li> </ul>                                                                                                       | <p>In a sitting position the chin is tucked downward against a resistance tool (e.g. rubber ball, neckline slimmer device):</p> <ul style="list-style-type: none"> <li>- Isometric CTAR: hold a sustained chin tuck against resistance</li> <li>- Isokinetic CTAR: perform a series of consecutive chin tucks against resistance [23-25].</li> </ul> |
| <b>Jaw opening against resistance (JOAR)</b><br>(rehabilitative)          | Modified<br>Shaker exercise                                                    | <ul style="list-style-type: none"> <li>- reduced movement of the hyolaryngeal complex</li> <li>- abnormal UES opening [24]</li> </ul>            | <p>To improve pharyngeal passage, thus pharyngeal residue [26]:</p> <ul style="list-style-type: none"> <li>- by strengthening and increasing the volume of the suprahyoid muscles,</li> <li>- by strengthening the jaw-opening muscles,</li> <li>- by increasing upward movement of the hyoid bone,</li> <li>- by improving both the extent of UES opening and the duration of pharynx passage [24-26].</li> </ul>                                                          | <p>Isometric JOAR in a sitting position with holding a sustained jaw opening against resistance: the jaw is opened against resistance, pressing mandible downward as forcefully as possible for 10 seconds [27,28].</p>                                                                                                                              |

|                                             |                                                                                                                                                                             |                                                                                                                                                                                         |                                                                                                                                                                                                                                                                                                                                                                                                                                                                                                             |                                                                                                                                                                                                                                                                  |
|---------------------------------------------|-----------------------------------------------------------------------------------------------------------------------------------------------------------------------------|-----------------------------------------------------------------------------------------------------------------------------------------------------------------------------------------|-------------------------------------------------------------------------------------------------------------------------------------------------------------------------------------------------------------------------------------------------------------------------------------------------------------------------------------------------------------------------------------------------------------------------------------------------------------------------------------------------------------|------------------------------------------------------------------------------------------------------------------------------------------------------------------------------------------------------------------------------------------------------------------|
| <b>Masako manoeuvre</b><br>(rehabilitative) | Tongue holding / Tongue hold<br>swallow manoeuvre / exercise                                                                                                                | <ul style="list-style-type: none"> <li>- decreased tongue base retraction</li> <li>- decreased pharyngeal constriction [3]</li> </ul>                                                   | To increase pharyngeal driving pressure, enhance bolus propulsion, and improve pharyngeal transit speed, thereby reducing residue [29]: <ul style="list-style-type: none"> <li>- by increasing tongue base retraction and promoting contact between the tongue base and the anterior bulging of the posterior pharyngeal wall,</li> <li>- by training pharyngeal constrictors during swallowing [3,29-31].</li> </ul>                                                                                       | Tongue hold.<br>Slightly protrude the tongue between the teeth (or gums), gently bite down to secure it in place, and swallow saliva while maintaining this position [29,30,32]                                                                                  |
| <b>Shaker exercise</b><br>(rehabilitative)  | Head lift exercise<br>Head raise exercise                                                                                                                                   | <ul style="list-style-type: none"> <li>- reduced movement of the hyolaryngeal complex</li> <li>- abnormal UES opening [33]</li> </ul>                                                   | To improve swallowing ability, bilateral pyriform sinus residue clearance and reduce post-swallow aspiration: <ul style="list-style-type: none"> <li>- by strengthening the suprahyoid muscles and promoting hyo-laryngeal complex elevation,</li> <li>- by increasing UES opening [33-35].</li> </ul>                                                                                                                                                                                                      | Lie in a supine position and lift the head to look at toes. <ul style="list-style-type: none"> <li>- Isometric head lift: maintain a sustained static head lift.</li> <li>- Isokinetic head lift: perform a series of consecutive head lifts [36,37].</li> </ul> |
| <b>Postural strategy</b>                    |                                                                                                                                                                             |                                                                                                                                                                                         |                                                                                                                                                                                                                                                                                                                                                                                                                                                                                                             |                                                                                                                                                                                                                                                                  |
| <b>Chin tuck</b><br>(compensatory)          | Chin down posture<br>Chin down movement<br>Chin to chest<br>Chin tuck exercise<br>(Forward) flexion of the head<br>Head / Neck / Head and neck flexion<br>Head tilt forward | Delayed: <ul style="list-style-type: none"> <li>- oral control,</li> <li>- swallowing trigger,</li> <li>- tongue base retraction [38]</li> </ul> Deficit in the vocal fold closure [39] | To improve airway protection, reduce laryngeal penetration and aspiration before and during swallowing [40,41]: <ul style="list-style-type: none"> <li>- by keeping the bolus in the oral cavity longer, facilitated by gravity,</li> <li>- by narrowing the laryngeal entrance, improving tongue-base and posterior pharyngeal wall contact, and reducing laryngo-hyoid and hyoid-mandibular distances [16,17,42-45],</li> </ul> by facilitating the opening of the upper esophageal sphincter (UES) [46]. | The chin is lowered prior to swallowing (“look down”)                                                                                                                                                                                                            |
| <b>Chin up</b><br>(compensatory)            | Head / Neck extension<br>Extension of the head<br>Head back (posture)                                                                                                       | <ul style="list-style-type: none"> <li>- oral &amp; lingual deficits</li> <li>- oral transfer deficits [39,47]</li> </ul>                                                               | To facilitate the pharyngeal phase of swallowing [46]: <ul style="list-style-type: none"> <li>- by improving bolus propulsion using gravity,</li> <li>- by mechanically widening the laryngeal entrance and narrowing the valleculae,</li> </ul> by decreasing the duration of the UES relaxation [48,49].                                                                                                                                                                                                  | The chin is elevated prior to swallowing (“look up”)                                                                                                                                                                                                             |
| <b>Head tilt</b><br>(compensatory)          | Head tilt (posture)<br>Head tilt to stronger / healthy / intact side<br>Tilting head                                                                                        | <ul style="list-style-type: none"> <li>- Unilateral oral and/or pharyngeal dysfunction, deficits [5,50,51]</li> </ul>                                                                   | To facilitate poor unilateral oral clearance, reduce unilateral post-swallow pharyngeal residue and aspiration risk [22,52,53]: <ul style="list-style-type: none"> <li>- by directing bolus toward the side of the head tilt (along the healthy side or the side with better function), while closing the weaker side of the pharynx by increasing lower pharyngeal pressure [52].</li> </ul>                                                                                                               | The head is tilted toward the healthy or stronger side prior to swallowing (“ear to the shoulder”)                                                                                                                                                               |
| <b>Head turn</b><br>(compensatory)          | Head rotation towards the weak / damaged / affected side<br>Head-rotation posture<br>Head turn (manoeuvre)                                                                  | <ul style="list-style-type: none"> <li>- Unilateral pharyngeal deficits [54,55]</li> </ul>                                                                                              | To facilitate swallowing, improve bolus flow control, reduce unilateral post-swallow residue and aspiration risk [51]: <ul style="list-style-type: none"> <li>- by rotating the head toward the affected side, reducing the anatomical space of the pyriform sinus and redirecting the bolus to the opposite, stronger, more sensitive side of the pharynx [50,52],</li> </ul> by prolonging the UES opening and lowering its pressure on the opposite side of head rotation [52].                          | The head is rotated toward the lateral damaged or weak side prior to swallowing (“look over the shoulder”)                                                                                                                                                       |
| <b>Side lying</b><br>(compensatory)         | Side-lying on the stronger side<br>Side-lying posture                                                                                                                       | Unilateral hypopharyngeal dysfunction or deficit <ul style="list-style-type: none"> <li>- (dysmotility, contractibility deficit) [5]</li> </ul>                                         | To improve bolus flow control and minimize unilateral pharyngeal residue and the post-swallow aspiration risk: <ul style="list-style-type: none"> <li>- by altering gravity to direct residue toward the stronger, more sensitive pharyngeal wall and pyriform sinus, facilitating its clearance with additional swallows [56-58]</li> <li>- by increasing hypopharyngeal pressure and maximum opening of the pharyngoesophageal sphincter</li> </ul>                                                       | Lying on the stronger, more sensitive side prior to swallowing                                                                                                                                                                                                   |

## References:

1. Fukuoka, T.; Ono, T.; Hori, K.; Tamine, K.-i.; Nozaki, S.; Shimada, K.; Yamamoto, N.; Fukuda, Y.; Domen, K. Effect of the effortful swallow and the Mendelsohn maneuver on tongue pressure production against the hard palate. *Dysphagia* **2013**, *28*, 539-547.
2. Hind, J.A.; Nicosia, M.A.; Roecker, E.B.; Carnes, M.L.; Robbins, J. Comparison of effortful and noneffortful swallows in healthy middle-aged and older adults. *Arch Phys Med Rehabil* **2001**, *82*, 1661-1665, doi:10.1053/apmr.2001.28006.
3. Lazarus, C.; Logemann, J.A.; Song, C.W.; Rademaker, A.W.; Kahrilas, P.J. Effects of voluntary maneuvers on tongue base function for swallowing. *Folia Phoniatr Logop* **2002**, *54*, 171-176, doi:10.1159/000063192.
4. Jang, H.J.; Leigh, J.H.; Seo, H.G.; Han, T.R.; Oh, B.M. Effortful swallow enhances vertical hyolaryngeal movement and prolongs duration after maximal excursion. *J Oral Rehabil* **2015**, *42*, 765-773, doi:10.1111/joor.12312.
5. Speyer, R. *Behavioural treatment of oropharyngeal dysphagia: bolus modification and management, sensory and motor behavioural techniques, postural adjustments, and swallow manoeuvres*; Medical Radiology: diagnostic imaging. Springer: Heidelberg, Germany, 2012.
6. van der Kruis, J.G.; Baijens, L.W.; Speyer, R.; Zwijnenberg, I. Biomechanical analysis of hyoid bone displacement in videofluoroscopy: a systematic review of intervention effects. *Dysphagia* **2011**, *26*, 171-182, doi:10.1007/s00455-010-9318-9.
7. Kahrilas, P.J.; Logemann, J.A.; Krugler, C.; Flanagan, E. Volitional augmentation of upper esophageal sphincter opening during swallowing. *Am J Physiol* **1991**, *260*, G450-456, doi:10.1152/ajpgi.1991.260.3.G450.
8. Lazarus, C.; Logemann, J.A.; Gibbons, P. Effects of maneuvers on swallowing function in a dysphagic oral cancer patient. *Head Neck* **1993**, *15*, 419-424, doi:10.1002/hed.2880150509.
9. Wheeler-Hegland, K.; Ashford, J.; Frymark, T.; McCabe, D.; Mullen, R.; Musson, N.; Hammond, C.S.; Schooling, T. Evidence-based systematic review: Oropharyngeal dysphagia behavioral treatments. Part II--impact of dysphagia treatment on normal swallow function. *J Rehabil Res Dev* **2009**, *46*, 185-194.
10. Inamoto, Y.; Saitoh, E.; Ito, Y.; Kagaya, H.; Aoyagi, Y.; Shibata, S.; Ota, K.; Fujii, N.; Palmer, J.B. The Mendelsohn Maneuver and its Effects on Swallowing: Kinematic Analysis in Three Dimensions Using Dynamic Area Detector CT. *Dysphagia* **2018**, *33*, 419-430, doi:10.1007/s00455-017-9870-7.
11. McCullough, G.H.; Kamarunas, E.; Mann, G.C.; Schmidley, J.W.; Robbins, J.A.; Crary, M.A. Effects of Mendelsohn maneuver on measures of swallowing duration post stroke. *Top Stroke Rehabil* **2012**, *19*, 234-243, doi:10.1310/tsr1903-234.
12. Logemann, J.A.; Pauloski, B.R.; Rademaker, A.W.; Colangelo, L.A. Speech and swallowing rehabilitation for head and neck cancer patients. *Oncology (Williston Park)* **1997**, *11*, 651-656, 659; discussion 659, 663-654.
13. Bodén, K.; Hallgren, A.; Witt Hedström, H. Effects of three different swallow maneuvers analyzed by videomanometry. *Acta Radiol* **2006**, *47*, 628-633, doi:10.1080/02841850600774043.
14. Mendelsohn, M.S.; Martin, R.E. Airway protection during breath-holding. *Ann Otol Rhinol Laryngol* **1993**, *102*, 941-944, doi:10.1177/000348949310201206.

15. Kasahara, T.; Hanayama, K.; Kodama, M.; Aono, K.; Masakado, Y. The efficacy of supraglottic swallow as an indirect swallowing exercise by analysis of hyoid bone movement. *Tokai J Exp Clin Med* **2009**, *34*, 72-75.
16. Bülow, M.; Olsson, R.; Ekberg, O. Videomanometric analysis of supraglottic swallow, effortful swallow, and chin tuck in healthy volunteers. *Dysphagia* **1999**, *14*, 67-72, doi:10.1007/pl00009589.
17. Hori, K.; Tamine, K.; Barbezat, C.; Maeda, Y.; Yamori, M.; Müller, F.; Ono, T. Influence of chin-down posture on tongue pressure during dry swallow and bolus swallows in healthy subjects. *Dysphagia* **2011**, *26*, 238-245, doi:10.1007/s00455-010-9292-2.
18. Guedes, R.; Azola, A.; Macrae, P.; Sunday, K.; Mejia, V.; Vose, A.; Humbert, I.A. Examination of swallowing maneuver training and transfer of practiced behaviors to laryngeal vestibule kinematics in functional swallowing of healthy adults. *Physiol Behav* **2017**, *174*, 155-161, doi:10.1016/j.physbeh.2017.03.018.
19. Logemann, J.A.; Pauloski, B.R.; Rademaker, A.W.; Colangelo, L.A. Super-supraglottic swallow in irradiated head and neck cancer patients. *Head Neck* **1997**, *19*, 535-540, doi:10.1002/(sici)1097-0347(199709)19:6<535::aid-hed11>3.0.co;2-4.
20. Martin, B.J.; Logemann, J.A.; Shaker, R.; Dodds, W.J. Coordination between respiration and swallowing: respiratory phase relationships and temporal integration. *J Appl Physiol (1985)* **1994**, *76*, 714-723, doi:10.1152/jappl.1994.76.2.714.
21. Ohmae, Y.; Logemann, J.A.; Kaiser, P.; Hanson, D.G.; Kahrilas, P.J. Effects of two breath-holding maneuvers on oropharyngeal swallow. *Ann Otol Rhinol Laryngol* **1996**, *105*, 123-131, doi:10.1177/000348949610500207.
22. Vose, A.; Nonnenmacher, J.; Singer, M.L.; González-Fernández, M. Dysphagia Management in Acute and Sub-acute Stroke. *Curr Phys Med Rehabil Rep* **2014**, *2*, 197-206, doi:10.1007/s40141-014-0061-2.
23. Park, J.S.; Hwang, N.K. Chin tuck against resistance exercise for dysphagia rehabilitation: A systematic review. *J Oral Rehabil* **2021**, *48*, 968-977, doi:10.1111/joor.13181.
24. Kraaijenga, S.A.; van der Molen, L.; Stuiver, M.M.; Teertstra, H.J.; Hilgers, F.J.; van den Brekel, M.W. Effects of Strengthening Exercises on Swallowing Musculature and Function in Senior Healthy Subjects: a Prospective Effectiveness and Feasibility Study. *Dysphagia* **2015**, *30*, 392-403, doi:10.1007/s00455-015-9611-8.
25. Yoon, W.L.; Khoo, J.K.; Rickard Liow, S.J. Chin tuck against resistance (CTAR): new method for enhancing suprahyoid muscle activity using a Shaker-type exercise. *Dysphagia* **2014**, *29*, 243-248, doi:10.1007/s00455-013-9502-9.
26. Wada, S.; Tohara, H.; Iida, T.; Inoue, M.; Sato, M.; Ueda, K. Jaw-opening exercise for insufficient opening of upper esophageal sphincter. *Arch Phys Med Rehabil* **2012**, *93*, 1995-1999, doi:10.1016/j.apmr.2012.04.025.
27. Choi, J.B.; Jung, Y.J.; Park, J.S. Comparison of 2 types of therapeutic exercise: jaw opening exercise and head lift exercise for dysphagic stroke: A pilot study. *Medicine (Baltimore)* **2020**, *99*, e22136, doi:10.1097/md.00000000000022136.
28. Koyama, Y.; Sugimoto, A.; Hamano, T.; Kasahara, T.; Toyokura, M.; Masakado, Y. Proposal for a Modified Jaw Opening Exercise for Dysphagia: A Randomized, Controlled Trial. *Tokai J Exp Clin Med* **2017**, *42*, 71-78.
29. Fujiu, M.; Logemann, J.A. Effect of a tongue-holding maneuver on posterior pharyngeal wall movement during deglutition. *American Journal of Speech-Language Pathology* **1996**, *5*, 23-30.

30. Doeltgen, S.H.; Witte, U.; Gumbley, F.; Huckabee, M.-L. Evaluation of manometric measures during tongue-hold swallows. *American Journal of Speech-Language Pathology* **2009**.
31. Umeki, H.; Takasaki, K.; Enatsu, K.; Tanaka, F.; Kumagami, H.; Takahashi, H. Effects of a tongue-holding maneuver during swallowing evaluated by high-resolution manometry. *Otolaryngology-Head and Neck Surgery* **2009**, *141*, 119-122, doi:10.1016/j.otohns.2009.01.025.
32. Fujiu-Kurachi, M.; Fujiwara, S.; Tamine, K.-i.; Kondo, J.; Minagi, Y.; Maeda, Y.; Hori, K.; Ono, T. Tongue pressure generation during tongue-hold swallows in young healthy adults measured with different tongue positions. *Dysphagia* **2014**, *29*, 17-24.
33. Easterling, C.; Grande, B.; Kern, M.; Sears, K.; Shaker, R. Attaining and maintaining isometric and isokinetic goals of the Shaker exercise. *Dysphagia* **2005**, *20*, 133-138, doi:10.1007/s00455-005-0004-2.
34. Antunes, E.B.; Lunet, N. Effects of the head lift exercise on the swallow function: a systematic review. *Gerodontology* **2012**, *29*, 247-257, doi:10.1111/j.1741-2358.2012.00638.x.
35. Mepani, R.; Antonik, S.; Massey, B.; Kern, M.; Logemann, J.; Pauloski, B.; Rademaker, A.; Easterling, C.; Shaker, R. Augmentation of deglutitive thyrohyoid muscle shortening by the Shaker Exercise. *Dysphagia* **2009**, *24*, 26-31, doi:10.1007/s00455-008-9167-y.
36. Shaker, R.; Easterling, C.; Kern, M.; Nitschke, T.; Massey, B.; Daniels, S.; Grande, B.; Kazandjian, M.; Dikeman, K. Rehabilitation of swallowing by exercise in tube-fed patients with pharyngeal dysphagia secondary to abnormal UES opening. *Gastroenterology* **2002**, *122*, 1314-1321, doi:10.1053/gast.2002.32999.
37. Shaker, R.; Kern, M.; Bardan, E.; Taylor, A.; Stewart, E.T.; Hoffmann, R.G.; Arndorfer, R.C.; Hofmann, C.; Bonnevier, J. Augmentation of deglutitive upper esophageal sphincter opening in the elderly by exercise. *Am J Physiol* **1997**, *272*, G1518-1522, doi:10.1152/ajpgi.1997.272.6.G1518.
38. Robbins, J.; Butler, S.G.; Daniels, S.K.; Diez Gross, R.; Langmore, S.; Lazarus, C.L.; Martin-Harris, B.; McCabe, D.; Musson, N.; Rosenbek, J. Swallowing and dysphagia rehabilitation: translating principles of neural plasticity into clinically oriented evidence. *J Speech Lang Hear Res* **2008**, *51*, S276-300, doi:10.1044/1092-4388(2008/021).
39. Macrae, P.; Anderson, C.; Humbert, I. Mechanisms of airway protection during chin-down swallowing. *J Speech Lang Hear Res* **2014**, *57*, 1251-1258, doi:10.1044/2014\_jslhr-s-13-0188.
40. Matsubara, K.; Kumai, Y.; Miyamoto, T.; Samejima, Y.; Yoshida, N.; Baba, H.; Orita, Y. The effect of a chin-down maneuver after esophagectomy on oropharyngeal swallowing pressure measured using high-resolution manometry. *Auris Nasus Larynx* **2020**, *47*, 141-147, doi:<https://doi.org/10.1016/j.anl.2019.06.001>.
41. Robbins, J.; Gensler, G.; Hind, J.; Logemann, J.A.; Lindblad, A.S.; Brandt, D.; Baum, H.; Lilienfeld, D.; Kosek, S.; Lundy, D.; et al. Comparison of 2 interventions for liquid aspiration on pneumonia incidence: a randomized trial. *Ann Intern Med* **2008**, *148*, 509-518, doi:10.7326/0003-4819-148-7-200804010-00007.
42. Ashford, J.; McCabe, D.; Wheeler-Hegland, K.; Frymark, T.; Mullen, R.; Musson, N.; Schooling, T.; Hammond, C.S. Evidence-based systematic review: Oropharyngeal dysphagia behavioral treatments. Part III--impact of dysphagia treatments on populations with neurological disorders. *J Rehabil Res Dev* **2009**, *46*, 195-204.

43. Bülow, M.; Olsson, R.; Ekberg, O. Videomanometric analysis of supraglottic swallow, effortful swallow, and chin tuck in patients with pharyngeal dysfunction. *Dysphagia* **2001**, *16*, 190-195.
44. McCabe, D.; Ashford, J.; Wheeler-Hegland, K.; Frymark, T.; Mullen, R.; Musson, N.; Hammond, C.S.; Schooling, T. Evidence-based systematic review: Oropharyngeal dysphagia behavioral treatments. Part IV--impact of dysphagia treatment on individuals' postcancer treatments. *J Rehabil Res Dev* **2009**, *46*, 205-214.
45. Terré, R.; Mearin, F. Effectiveness of chin-down posture to prevent tracheal aspiration in dysphagia secondary to acquired brain injury. A videofluoroscopy study. *Neurogastroenterol Motil* **2012**, *24*, 414-419, e206, doi:10.1111/j.1365-2982.2011.01869.x.
46. Solazzo, A.; Monaco, L.; Del Vecchio, L.; Tamburrini, S.; Iacobellis, F.; Berritto, D.; Pizza, N.L.; Reginelli, A.; Di Martino, N.; Grassi, R. Investigation of compensatory postures with videofluoromanometry in dysphagia patients. *World J Gastroenterol* **2012**, *18*, 2973-2978, doi:10.3748/wjg.v18.i23.2973.
47. Cheng, I.; Hamad, A.; Sasegbon, A.; Hamdy, S. Advances in the Treatment of Dysphagia in Neurological Disorders: A Review of Current Evidence and Future Considerations. *Neuropsychiatr Dis Treat* **2022**, *18*, 2251-2263, doi:10.2147/ndt.S371624.
48. Calvo, I.; Sunday, K.L.; Macrae, P.; Humbert, I.A. Effects of chin-up posture on the sequence of swallowing events. *Head Neck* **2017**, *39*, 947-959, doi:10.1002/hed.24713.
49. Castell, J.A.; Castell, D.O.; Schultz, A.R.; Georgeson, S. Effect of head position on the dynamics of the upper esophageal sphincter and pharynx. *Dysphagia* **1993**, *8*, 1-6, doi:10.1007/bf01351470.
50. Logemann, J.A.; Kahrilas, P.J.; Kobara, M.; Vakil, N.B. The benefit of head rotation on pharyngoesophageal dysphagia. *Arch Phys Med Rehabil* **1989**, *70*, 767-771.
51. Ohmae, Y.; Ogura, M.; Kitahara, S.; Karaho, T.; Inouye, T. Effects of head rotation on pharyngeal function during normal swallow. *Ann Otol Rhinol Laryngol* **1998**, *107*, 344-348, doi:10.1177/000348949810700414.
52. Kim, C.K.; Ryu, J.S.; Song, S.H.; Koo, J.H.; Lee, K.D.; Park, H.S.; Oh, Y.; Min, K. Effects of Head Rotation and Head Tilt on Pharyngeal Pressure Events Using High Resolution Manometry. *Ann Rehabil Med* **2015**, *39*, 425-431, doi:10.5535/arm.2015.39.3.425.
53. Rasley, A.; Logemann, J.A.; Kahrilas, P.J.; Rademaker, A.W.; Pauloski, B.R.; Dodds, W.J. Prevention of barium aspiration during videofluoroscopic swallowing studies: value of change in posture. *AJR Am J Roentgenol* **1993**, *160*, 1005-1009, doi:10.2214/ajr.160.5.8470567.
54. Ertekin, C.; Keskin, A.; Kiylioglu, N.; Kirazli, Y.; On, A.Y.; Tarlaci, S.; Aydoğdu, I. The effect of head and neck positions on oropharyngeal swallowing: a clinical and electrophysiologic study. *Arch Phys Med Rehabil* **2001**, *82*, 1255-1260, doi:10.1053/apmr.2001.25156.
55. Lee, H.; Rho, H.; Cheon, H.-J.; Oh, S.M.; Kim, Y.-H.; Chang, W.H. Selection of Head Turn Side on Pharyngeal Dysphagia in Hemiplegic Stroke Patients: a Preliminary Study. *Brain Neurorehabil* **2018**, *11*.
56. Drake, W.; O'Donoghue, S.; Bartram, C.; Lindsay, J.; Greenwood, R. Eating in side-lying facilitates rehabilitation in neurogenic dysphagia. *Brain Inj* **1997**, *11*, 137-142, doi:10.1080/026990597123737.

57. Kaneoka, A.; Inokuchi, H.; Yamauchi, A.; Sakai, T.; Saito, Y.; Haga, N. Utility of side-lying posture in a patient with severe dysphagia secondary to oropharyngeal cancer surgery: A single case report. *Advances in Communication and Swallowing* **2022**, *25*, 29-36, doi:10.3233/acs-210039.
58. Lazarus, C.L. History of the Use and Impact of Compensatory Strategies in Management of Swallowing Disorders. *Dysphagia* **2017**, *32*, 3-10, doi:10.1007/s00455-016-9779-6.
